# Supplementary material for: Multistimuli and fingertip-triggered luminescence switching: a five-colored ink-free rewritable secured platform with strongest red emission
Source: Royal Society of Chemistry journal article supplement (doi:10.1039/d1tc02012a), 2021-01-01
Supplement: d1tc02012a1.pdf [file d1tc02012a1.pdf]

# Multistimuli and fingertip-triggered luminescence switching: Five colored ink-free rewritable secured platform with strongest red emission

Banchhanidhi Prusti<sup>1</sup>, Pallavi Sarkar<sup>2</sup>, Swapan Pati<sup>2</sup> and Manab Chakravarty<sup>1\*</sup>

<sup>1</sup>Department of Chemistry, Birla Institute of Science and technology (BITS), Hyderabad Campus, Jawahar Nagar, Shameerpet Mandal, Hyderabad 500078, India

<sup>2</sup>Department of Chemistry, Jawaharlal Nehru Centre for Advanced Scientific Research (JNCASR),

## Contents:

|                                                                                                              |             |
|--------------------------------------------------------------------------------------------------------------|-------------|
| 1. <sup>1</sup> H, <sup>31</sup> C and <sup>31</sup> P NMR spectra for <b>C5CBZP</b> and <b>C5DPAP</b> ----- | S2-S4       |
| 2. <sup>1</sup> H, <sup>31</sup> C NMR spectra for <b>CBZ4Py</b> and <b>DPA4Py</b> -----                     | S5-S6       |
| 3. Absorbance spectra for <b>CBZ4Py</b> and <b>DPA4Py</b> -----                                              | S7          |
| 4. Absorbance and PL spectra in different solvents for <b>CBZ4Py</b> and <b>DPA4Py</b> -----                 | S7          |
| 5. Solid-state absorbance spectra for <b>CBZ4Py</b> , <b>DPA4Py-B</b> and <b>DPA4Py-G</b> -----              | S8          |
| 6. Crystallographic parameters table for <b>CBZ4Py</b> , <b>DPA4Py-B</b> and <b>DPA4Py-G</b> -----           | S8-S9       |
| 7. PL reversibility plot for <b>CBZ4Py</b> , <b>DPA4Py-B</b> and <b>DPA4Py-G</b> -----                       | S9          |
| 8. Molecular crystal packing for <b>DPA4Py-B</b> and <b>DPA4Py-G</b> -----                                   | S9          |
| 9. Intermolecular interactions for <b>CBZ4Py</b> -----                                                       | S10         |
| 10. HOMO-LUMO diagram for <b>DPA4Py-B</b> and <b>DPA4Py-G</b> -----                                          | S10-<br>S11 |
| 11. Optimized geometry of tetramer for <b>DPA4Py-B</b> and <b>DPA4Py-G</b> -----                             | S11         |
| 12. Hirshfeld calculations for <b>DPA4Py-B</b> and <b>DPA4Py-G</b> -----                                     | S11-<br>S12 |
| 13. Intermolecular interactions table for <b>CBZ4Py</b> , <b>DPA4Py-B</b> and <b>DPA4Py-G</b> -----          | S13         |
| 14. Intermolecular interactions for <b>CBZ4Py</b> -----                                                      | S13         |

15. PL spectra under acid/base stimuli and reversibility plot for **CBZ4Py**-----S14  
S14
16. Different acids stimuli table for **CBZ4Py**-----S14-  
S15
17. <sup>1</sup>H NMR titration spectra with TFA/TEA for **CBZ4Py** and **DPA4Py**-----S15-  
S16
18. Lifetime decay table/plot for **CBZ4Py**, **DPA4Py-B** and **DPA4Py-G**-----  
S17

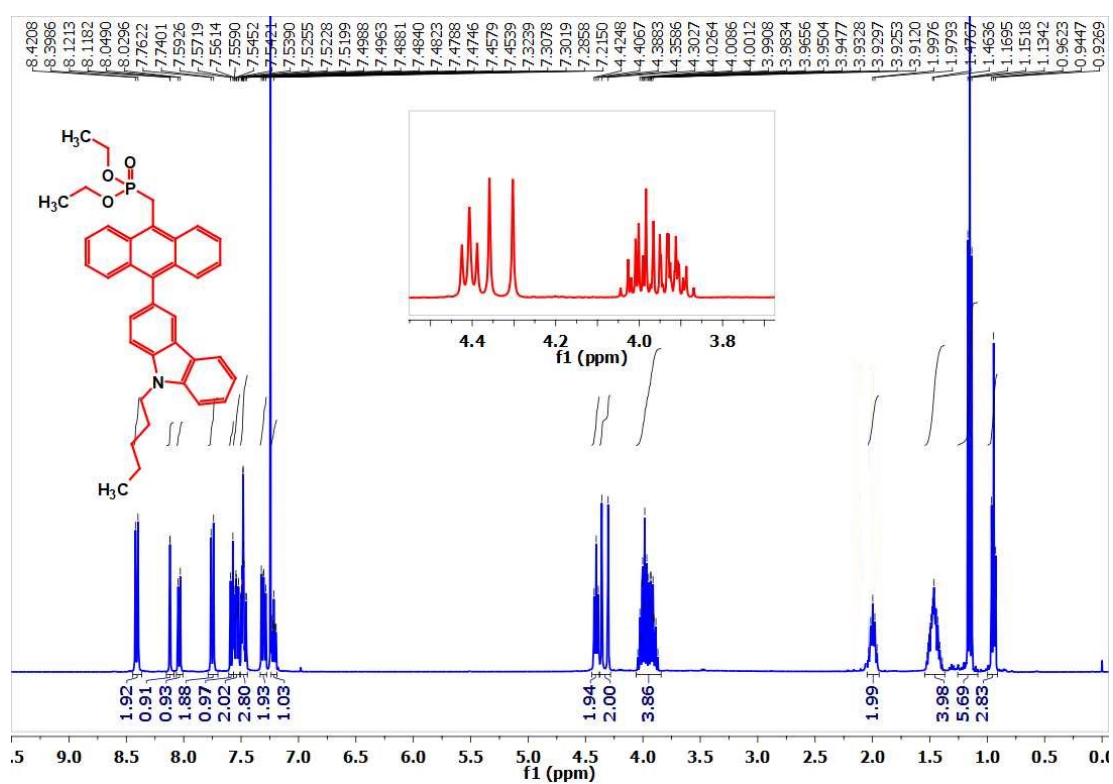

**Fig S1:** <sup>1</sup>H NMR spectrum for **C5CBZP** in CDCl<sub>3</sub>.

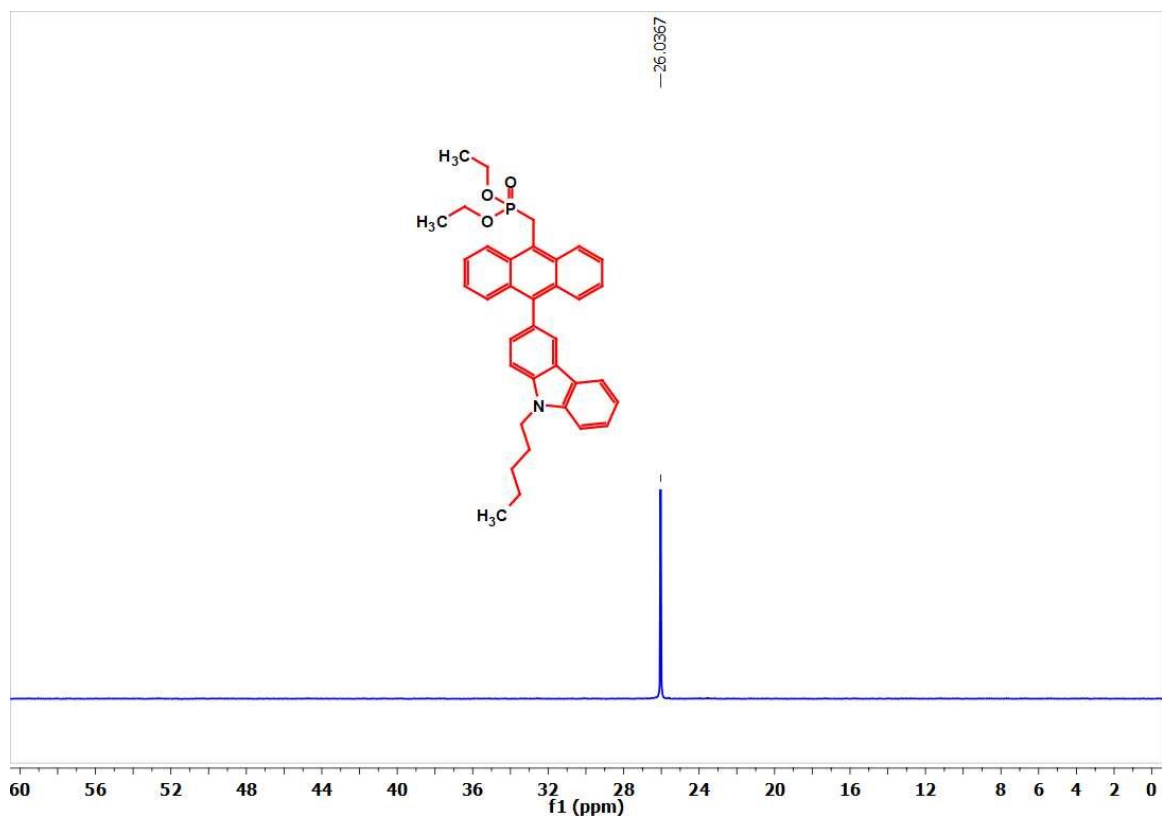

**Fig S2:**  $^{31}\text{P}$  NMR spectrum for C5CBZP in  $\text{CDCl}_3$ .

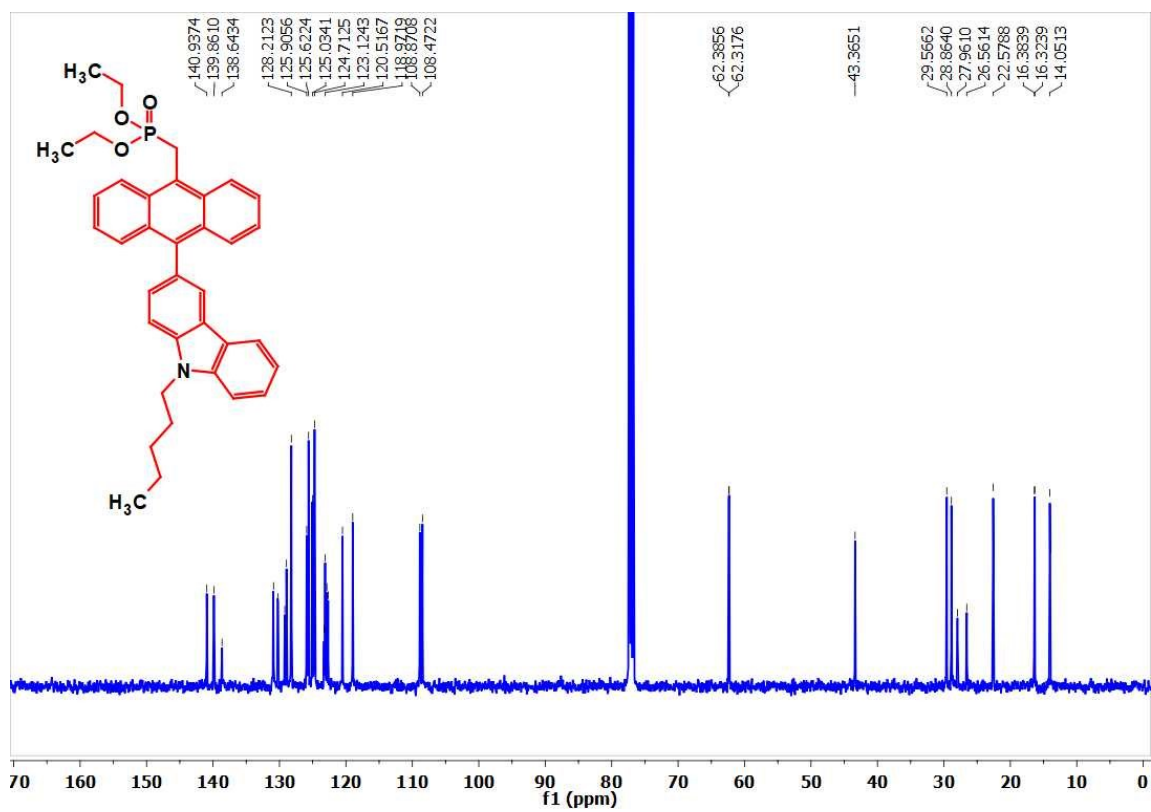

**Fig S3:**  $^{13}\text{C}$  NMR spectrum for C5CBZP in  $\text{CDCl}_3$ .

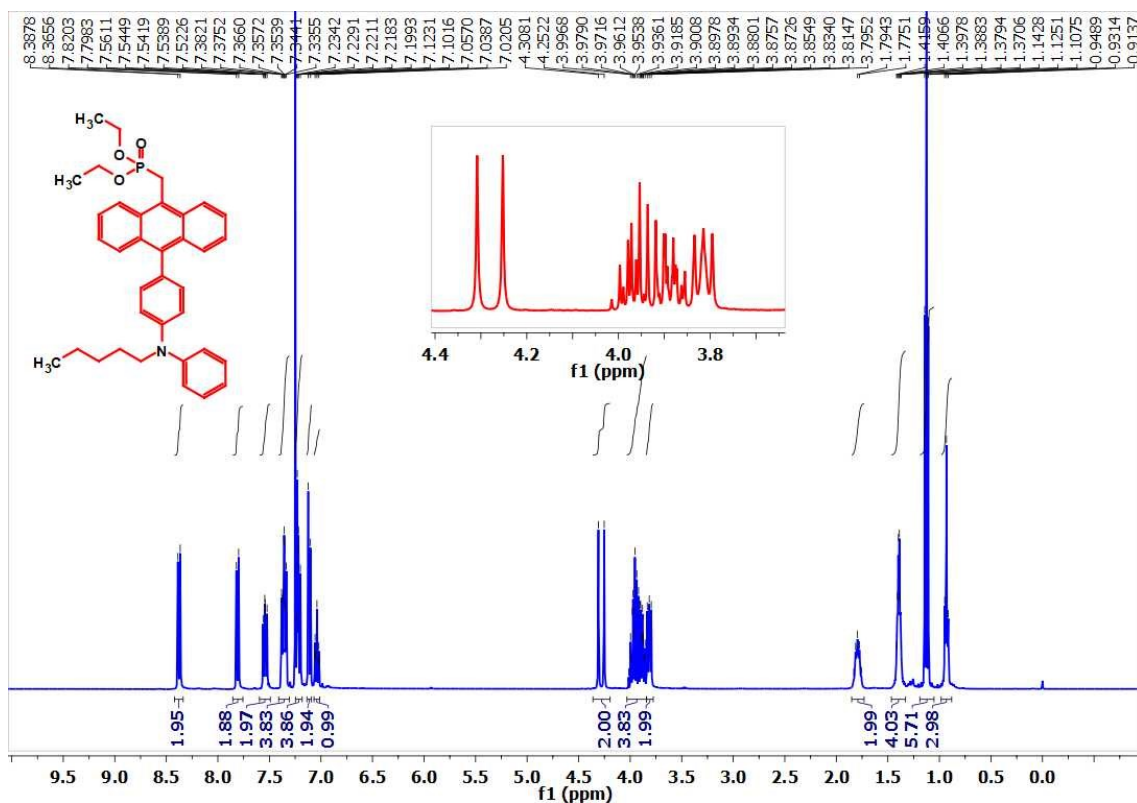

Fig S4: <sup>1</sup>H NMR spectrum for C5DPAP in CDCl<sub>3</sub>.

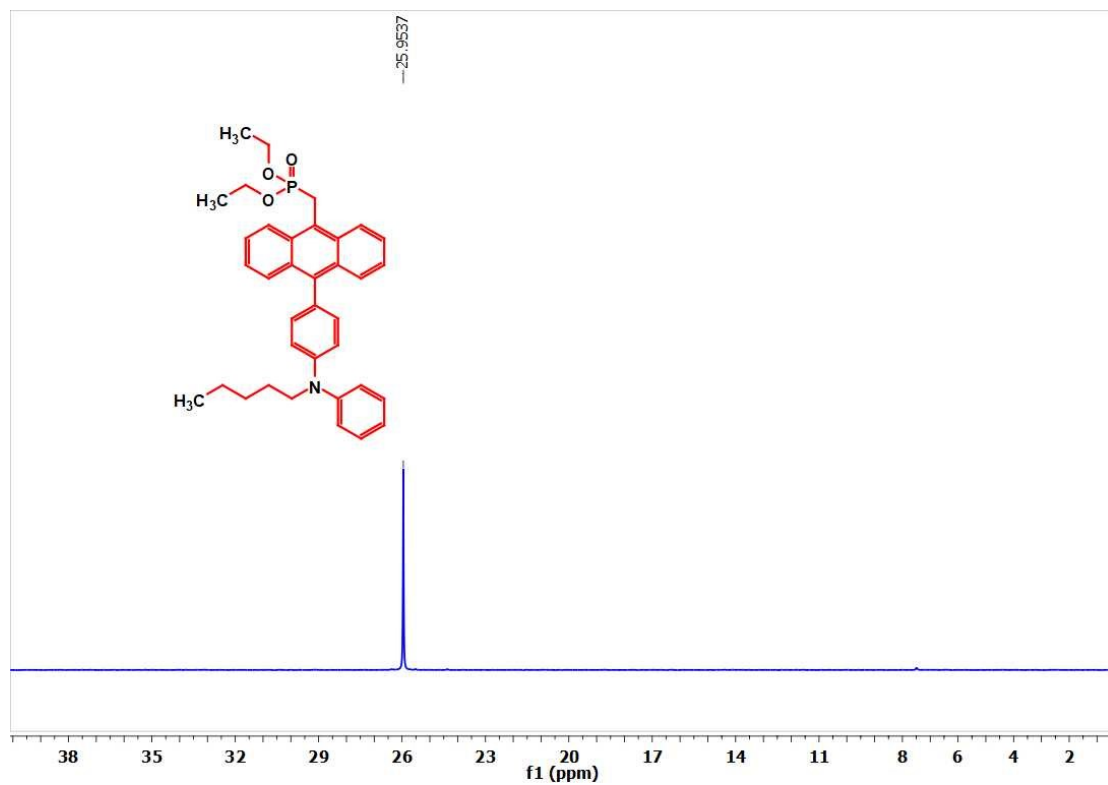

Fig S5: <sup>31</sup>P NMR spectrum for C5DPAP in CDCl<sub>3</sub>.

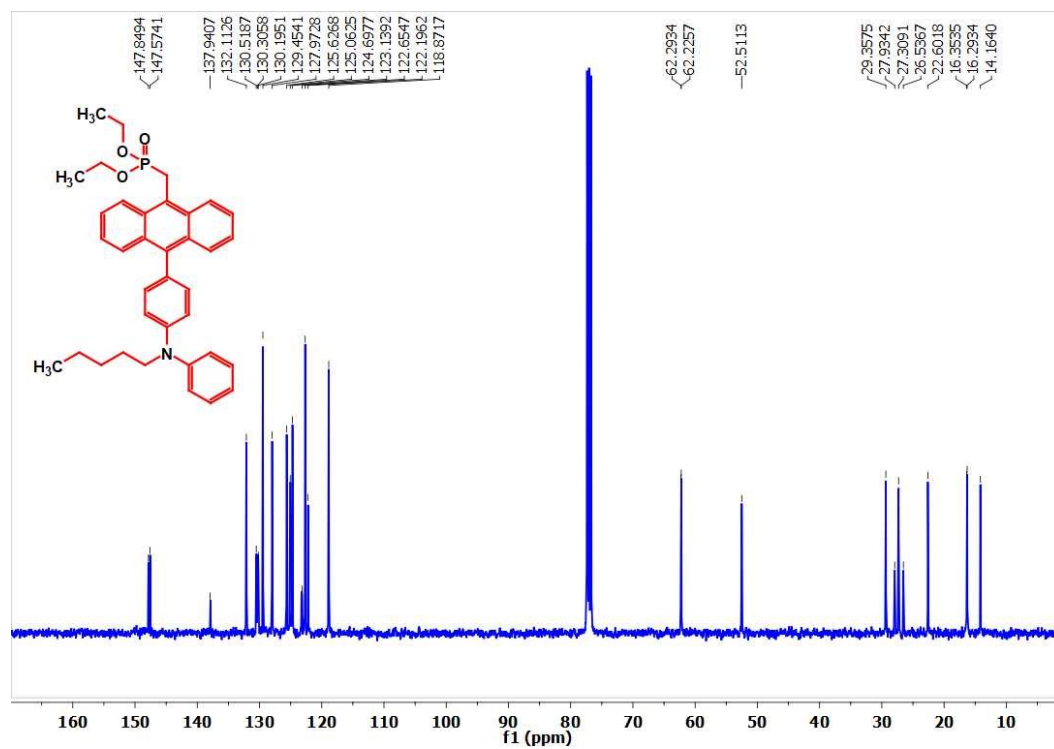

Fig S6:  $^{13}\text{C}$  NMR spectrum for C5DPAP in  $\text{CDCl}_3$ .

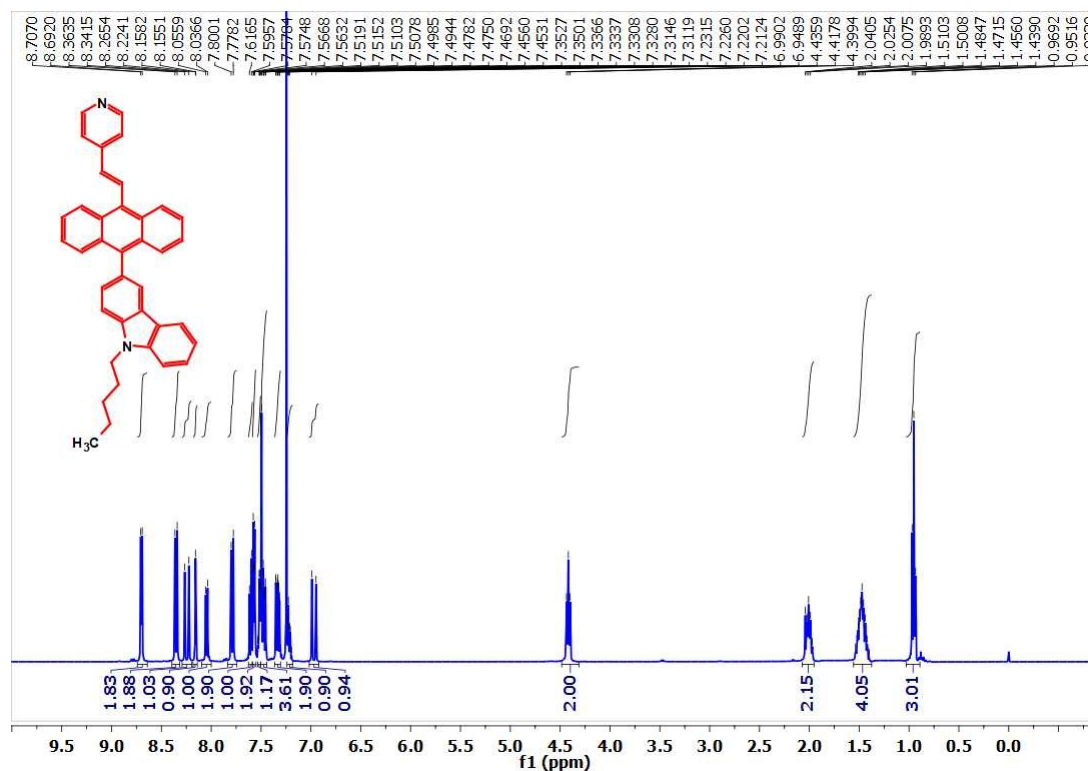

Fig S7:  $^1\text{H}$  NMR spectrum for CBZ4Py in  $\text{CDCl}_3$ .

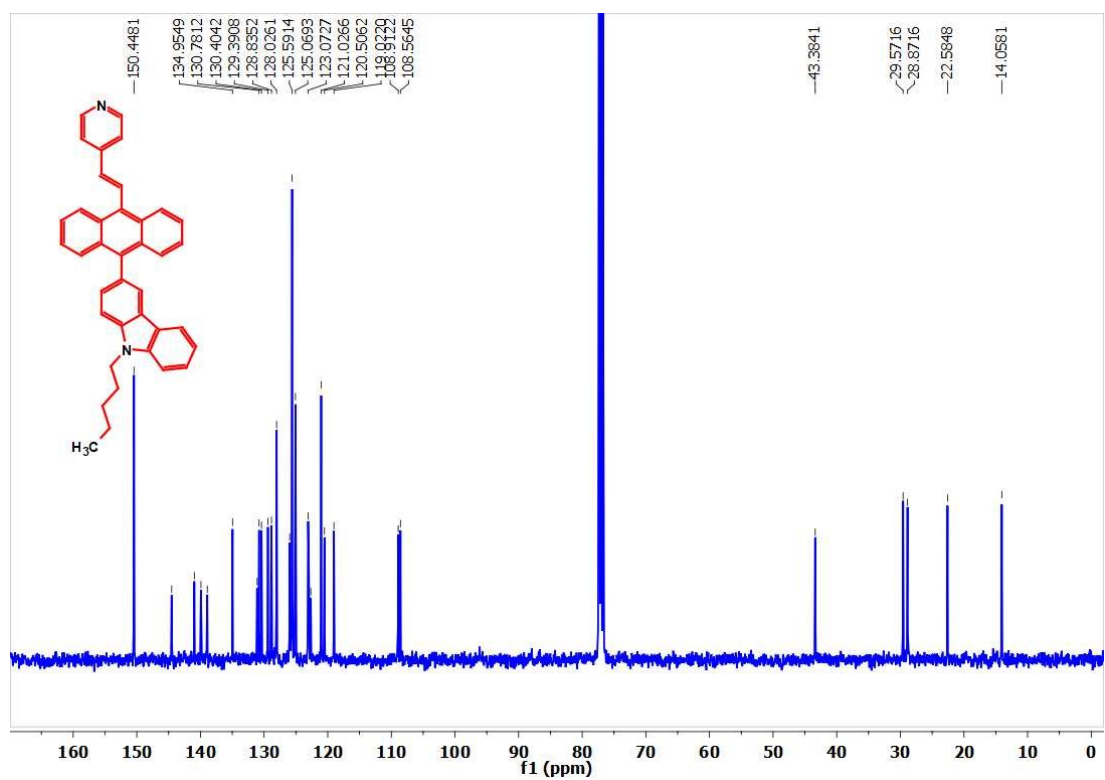

Fig S8:  $^{13}\text{C}$  NMR spectrum for CBZ4Py in  $\text{CDCl}_3$ .

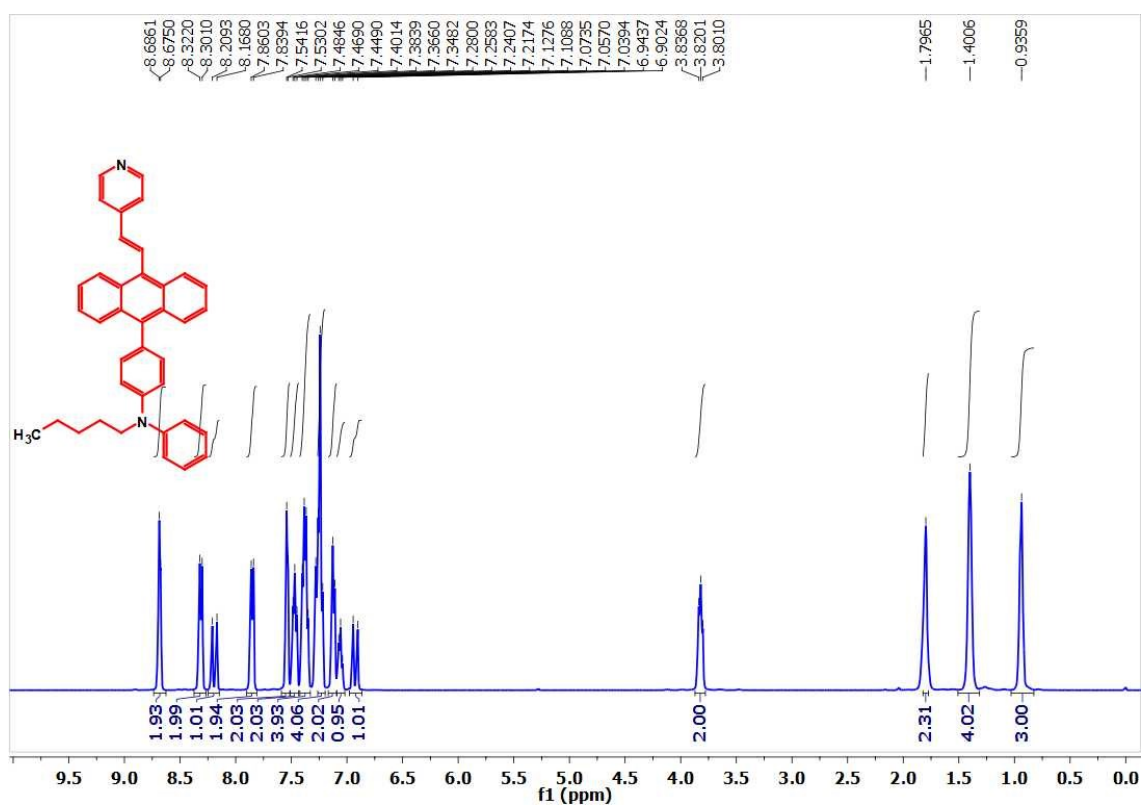

Fig S9:  $^1\text{H}$  NMR spectrum for DPA4Py in  $\text{CDCl}_3$ .

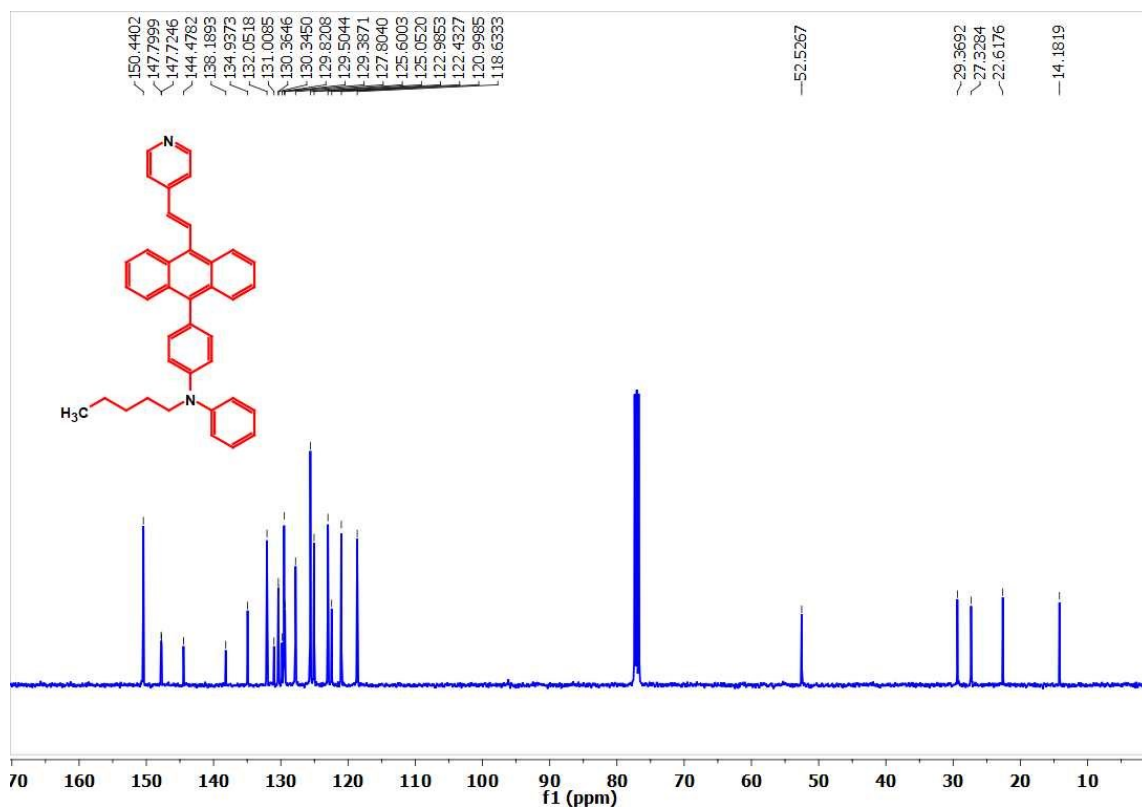

Fig S10:  $^{13}\text{C}$  NMR spectrum for DPA4Py in  $\text{CDCl}_3$ .

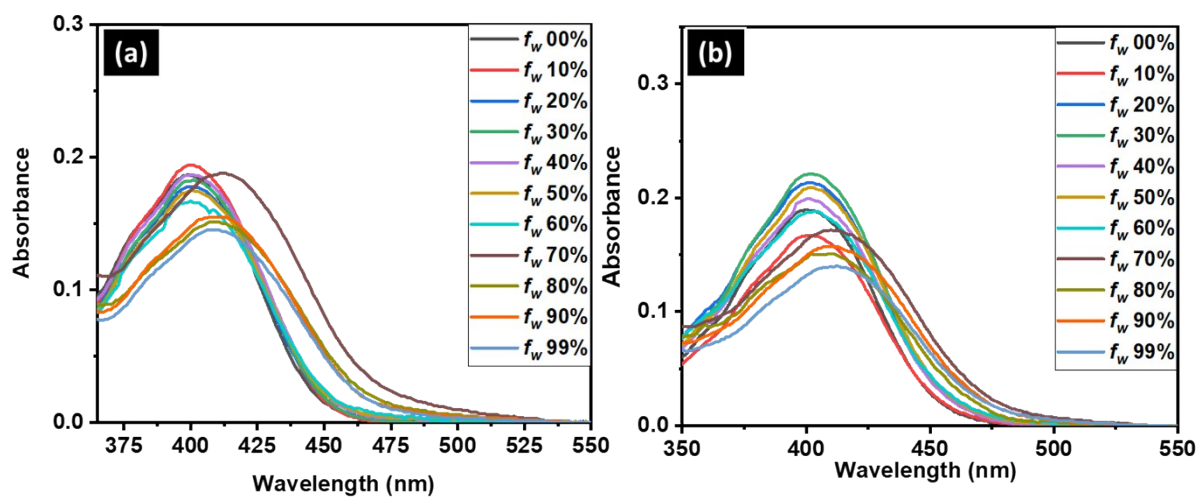

Fig S11: Absorbance spectra with different fractions of water in MeCN for (a) CBZ4Py and (b) DPA4Py. ( $10\ \mu\text{M}$ ).

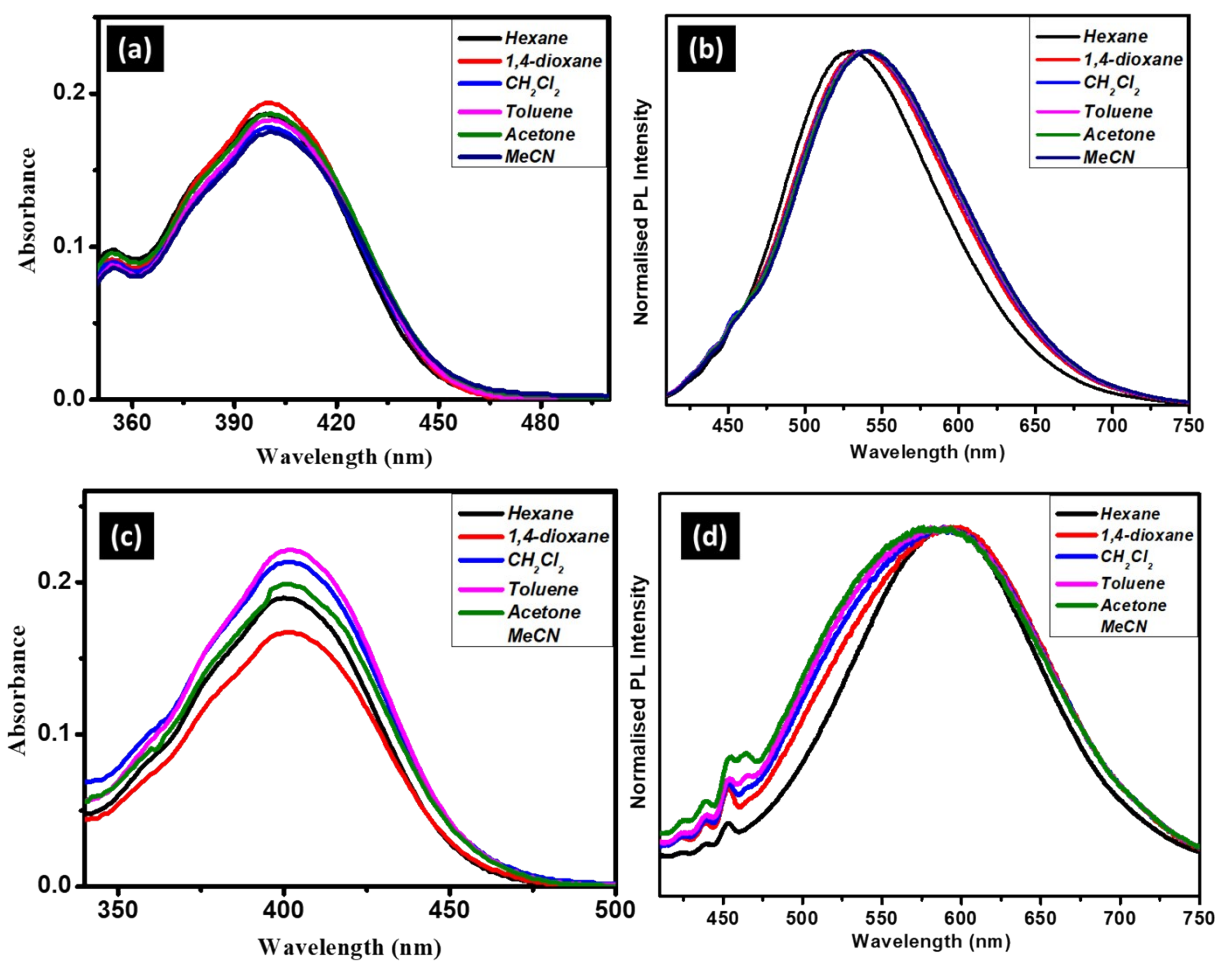

**Fig S12:** (a) Absorbance spectra in different solvent for (a) CBZ4Py, (c) DPA4Py and PL spectra in different solvents for (b) CBZ4Py, (d) DPA4Py.

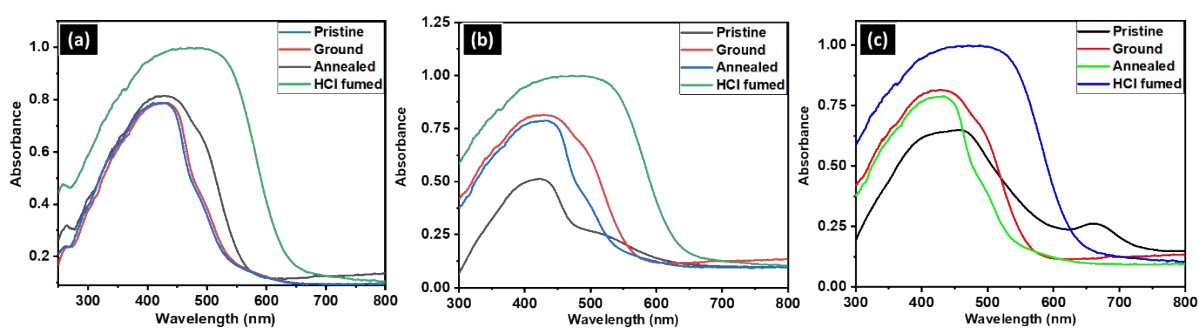

**Fig S13:** Absorbance spectra with different stimuli for (a) CBZ4Py and (b) DPA4Py-B, (c) DPA4Py-G.

**Table-S1:** Crystallographic parameters for CBZ4Py, DPA4Py-B and DPA4Py-G



| <b>Compounds</b>                                            | <b>CBZ4Py</b> | <b>DPA4Py-B</b> | <b>DPA4Py-G</b> |
|-------------------------------------------------------------|---------------|-----------------|-----------------|
| Emp. Formula                                                | C38 H32 N2    | C38 H34 N2      | C38 H34 N2      |
| Formula weight                                              | 516.65        | 518.71          | 518.71          |
| Crystal system                                              | monoclinic    | orthorhombic    | monoclinic      |
| Space group                                                 | P 1 21/c 1    | P c a 21        | P 1 21/c 1      |
| <i>a</i> /Å                                                 | 13.6626(4)    | 9.9341(2)       | 18.7495(2)      |
| <i>b</i> /Å                                                 | 9.4221(2)     | 17.0176(4)      | 9.09830(10)     |
| <i>c</i> /Å                                                 | 21.1928(6)    | 17.0876(3)      | 18.4595(2)      |
| /degree                                                     | 90            | 90              | 90              |
| /degree                                                     | 92.901(3)     | 90              | 114.7790(10)    |
| /degree                                                     | 90            | 90              | 90              |
| <i>V</i> /Å <sup>3</sup>                                    | 2724.66(13)   | 2888.74(10)     | 2859.06(6)      |
| <i>Z</i>                                                    | 4             | 8               | 4               |
| <i>D</i> <sub>calc</sub> /g cm <sup>-3</sup>                | 1.260         | 1.193           | 1.205           |
| /mm <sup>-1</sup>                                           | 0.555         | 0.524           | 0.529           |
| <i>F</i> (000)                                              | 1096.0        | 1104.0          | 1104.0          |
| Data/ restraints/<br>parameters                             | 5759 /0/359   | 4269/1/362      | 6084/0/362      |
| <i>S</i>                                                    | 1.059         | 1.053           | 1.031           |
| R1 [I>2(I)]                                                 | 0.0588        | 0.0520          | 0.0391          |
| wR2 [all data]                                              | 0.1672        | 0.1434          | 0.1076          |
| Max./min.<br>residual electron<br>dens. [eÅ <sup>-3</sup> ] | 0.564/-0.333  | 0.0494/-0.2848  | 0.1936/-0.2230  |

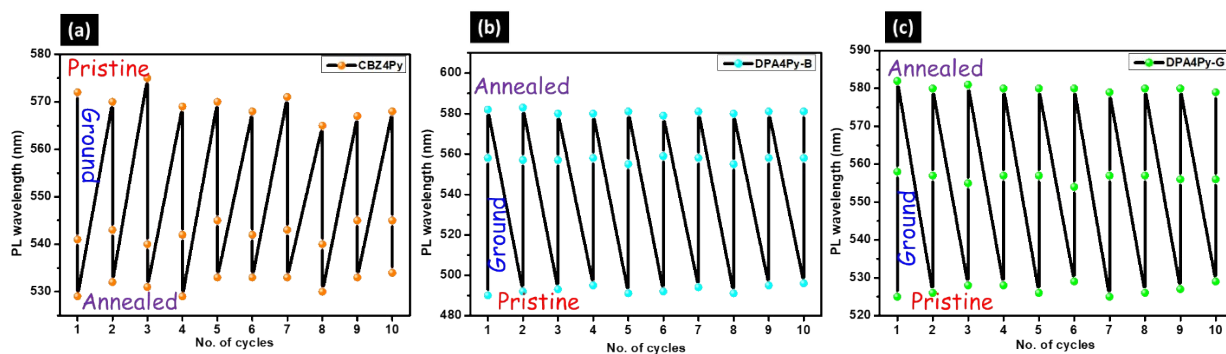

**Fig S14:** Reversibility towards external stimuli for CBZ4Py, DPA4Py-B and DPA4Py-G

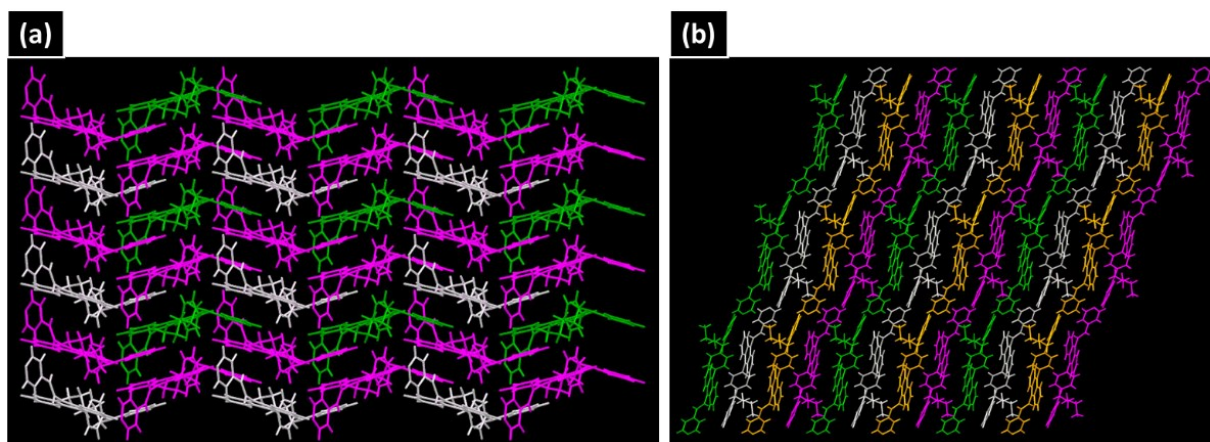

**Fig S15:** symmetry equivalence crystal packing for (a) DPA4Py-B, (b) DPA4Py-G along b-axis.

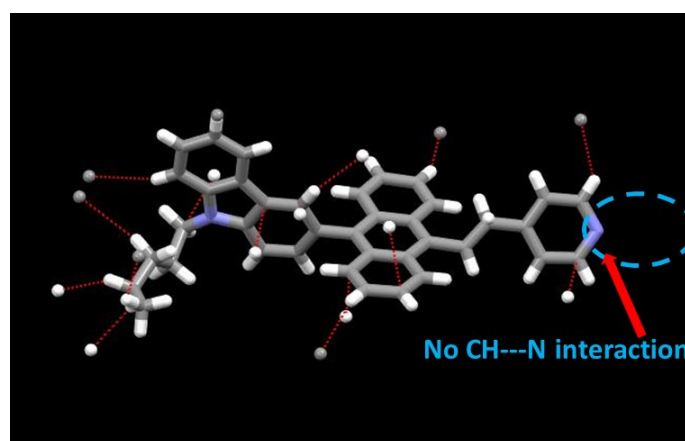

**Fig S16.** All probable intermolecular interactions for CBZ4Py (showing no CH---N interaction)

*Computational details:*

Geometry optimizations of all the compounds are carried out with the aid of Density functional theory (DFT) using Gaussian 16<sup>1</sup> suite of programs. B3LYP-D3<sup>2-3</sup> exchange-correlation functional along with 6-31G(d,p) basis set is used for all atoms. Further details are given in the supporting. Optimized geometries are further subjected to vibrational analysis to identify the structures as minima with all positive frequencies. Excited states calculations are performed using time-dependent density functional theory (TD-DFT) methods with long-range corrected CAM-B3LYP<sup>4</sup> exchange correlational functional in combination with 6-31+g(d,p) basis set. Gradient density plot calculations are carried out using Multiwfn 3.6 package.<sup>5</sup>

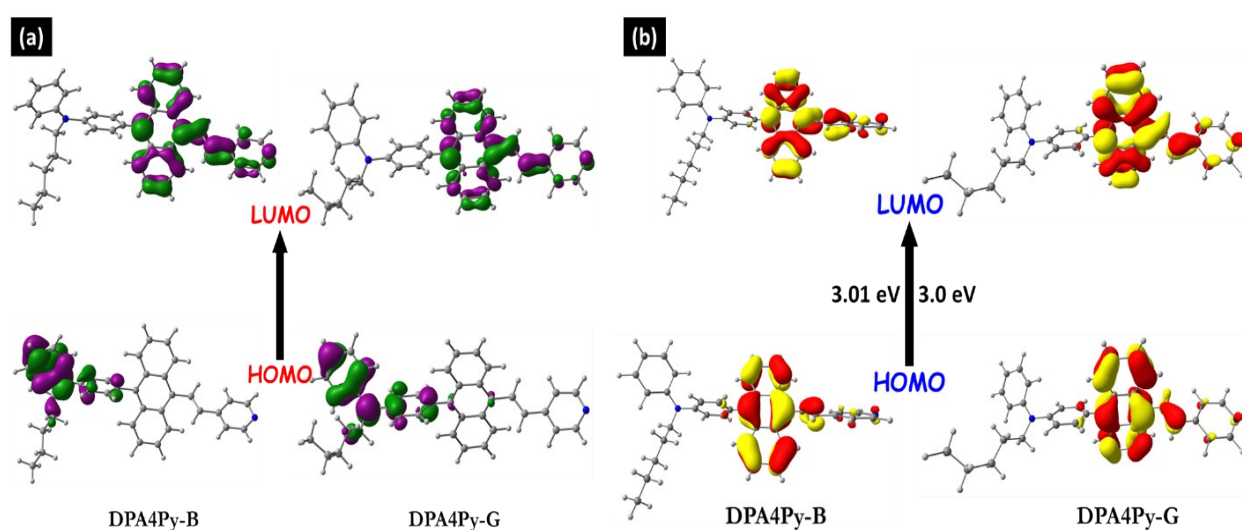

**Fig S17:** (a) Frontier molecular orbitals for **DPA4Py-B** (left) and **DPA4Py-G** (right), (b) NTO orbitals for optically excited states for **DPA4Py-B** (left) and **DPA4Py-G** (right)

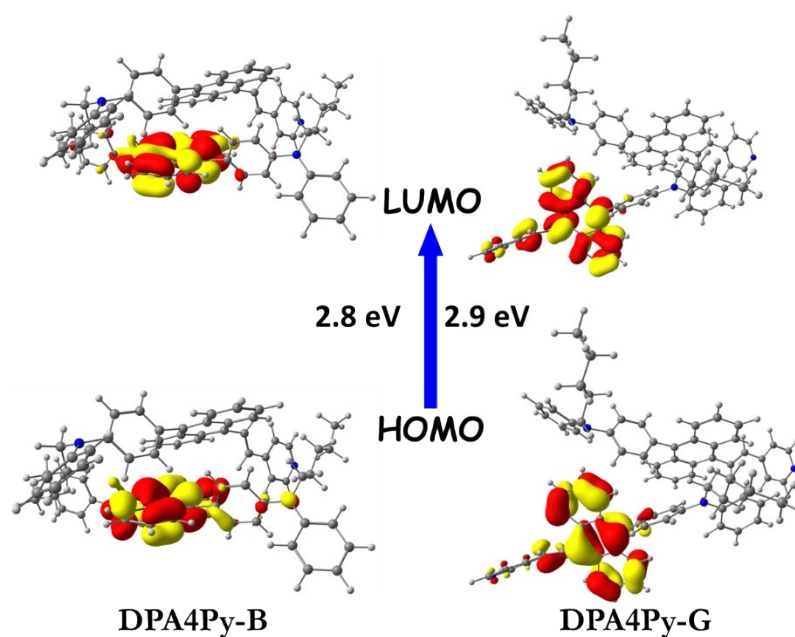

**Fig S18:** Optically excited states for **DPA4Py-B** and **DPA4Py-G** in dimeric form.

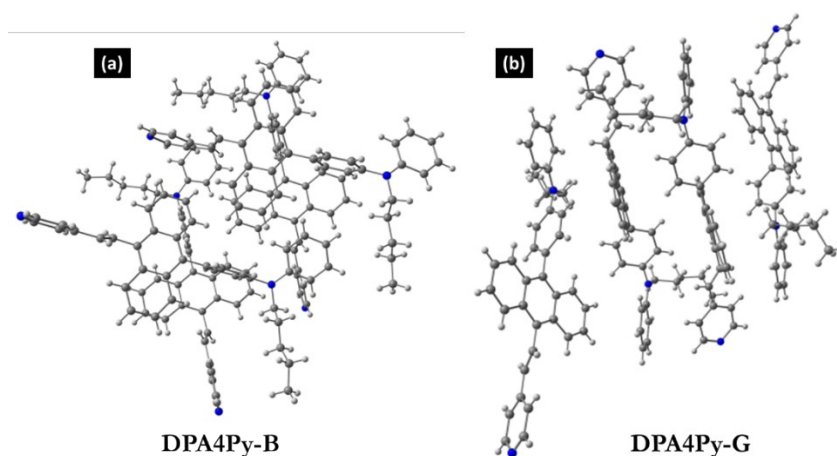

**Fig S19:** Optimized geometry in the tetrameric unit for (a) **DPA4Py-B** and (b) **DPA4Py-G**

**Hirshfeld Calculation:** Hirshfeld surface analysis and calculation of the void space are quantitative tools used to understand non-covalent interactions. We have generated Hirshfeld surfaces for **DPA4Py-B** and **DPA4Py-G** with an isovalue of 0.5 au. The surface is generated, and the interactions are shown in terms of  $d_e$  and  $d_i$ , in which  $d_e$  and  $d_i$  are the distances of an atom external or internal to the generated Hirshfeld surfaces, together this pair ( $d_e$  and  $d_i$ ) generates a 2D fingerprint plot. The different colors on the fingerprint plot represent the

frequency of occurrence of the interaction. A red spot represents the direct interaction between two atoms. Ultimately it gives a normalized contact distance ( $d_{norm}$ ). The  $d_{norm}$  values are mapped onto the Hirshfeld surface using a red, white, and blue color scheme; red, white, and blue regions correspond to the strong, medium, and weak interactions, respectively. All the Hirshfeld surfaces were generated using Crystal Explorer 3.1 software. The void spaces were calculated with the iso value of 0.002 a.u. within a radius of the unit cell +5 Å (default).

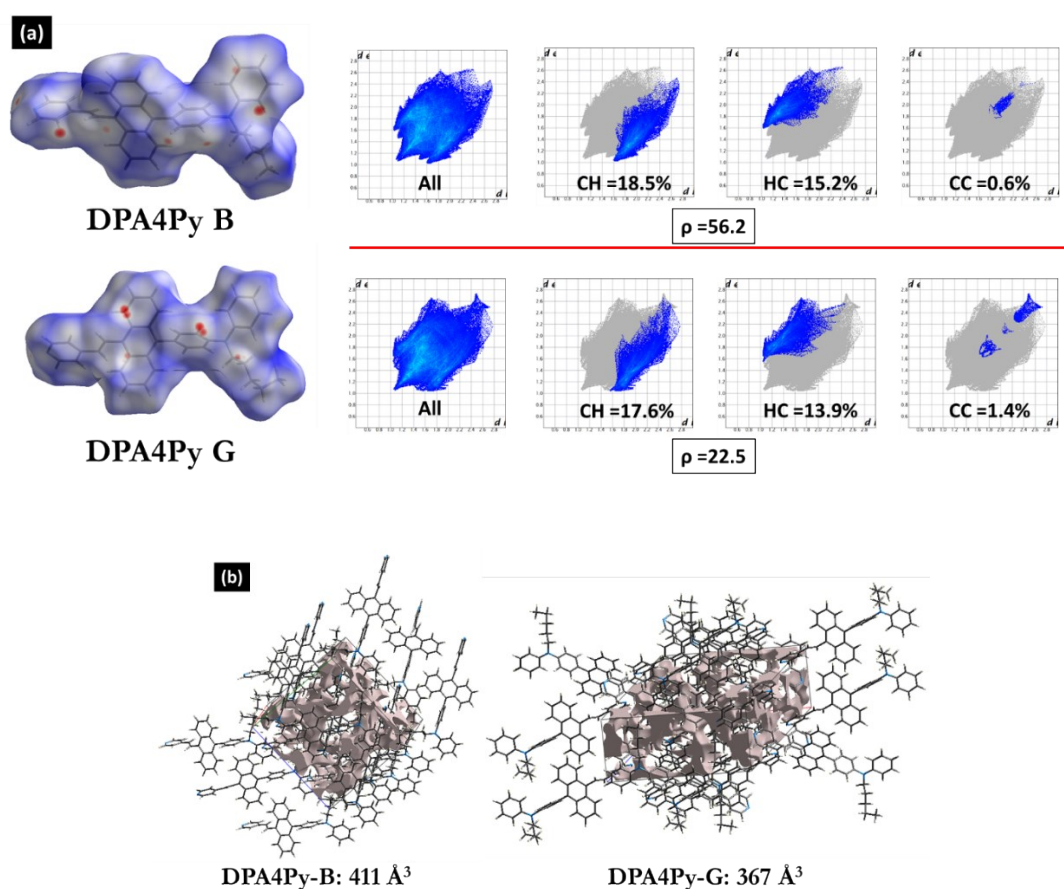

**Fig S20** (a) Hirshfeld surface mapped 2D fingerprint plots for **DPA4Py-B** and **DPA4Py-G**, (b) Hirshfeld generated unit cell void space for **DPA4Py-B** and **DPA4Py-G**.

**Table-S2:** All intermolecular interactions in molecular crystal packing for **CBZ4Py**, **DPA4Py-B** and **DPA4Py-G**

| Interactions | CBZ4Py | DPA4Py-B | DPA4Py-G |
|--------------|--------|----------|----------|
|--------------|--------|----------|----------|



| Acids                                                        | $\lambda_{\text{emi}}$ (nm) | $\Phi_f$ (% absolute) * |
|--------------------------------------------------------------|-----------------------------|-------------------------|
| Hydrochloric acid (HCl)                                      | 626                         | 51                      |
| Trifluoroacetic acid (TFA)                                   | 624                         | 49.5                    |
| Trifluoromethanesulfonic acid (TfOH)                         | 625                         | 50.5                    |
| Sulfuric acid (H <sub>2</sub> SO <sub>4</sub> ) <sup>#</sup> | 626                         | 58.5                    |

\* The absolute quantum yield was measured using a calibrated integrating sphere having an absolute error of  $\pm 2\%$

<sup>#</sup>We have generated the fumes by heating (using hot air gun) concentrated H<sub>2</sub>SO<sub>4</sub> taken in a small glass vial. The fume was taken through a silicone pipe and linked to the vial containing the probe. The acidification experiment was performed inside an effective fume hood.

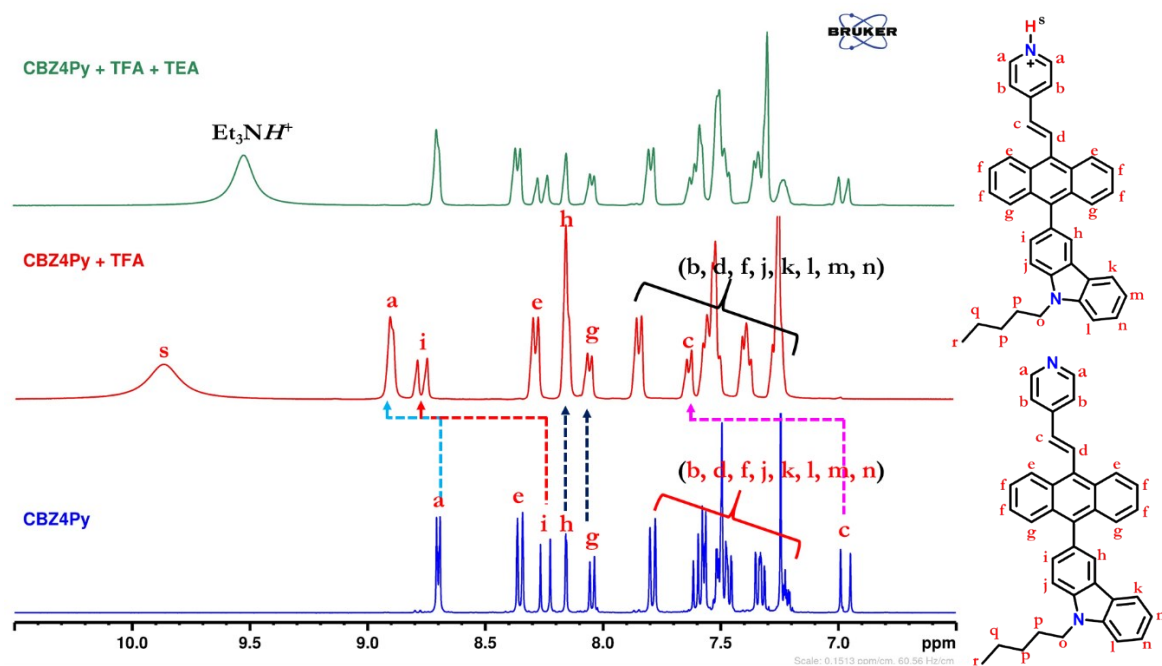

**Fig S21:** <sup>1</sup>H NMR titration with TFA/TEA for **CBZ4Py** in CDCl<sub>3</sub> (for aromatic protons)

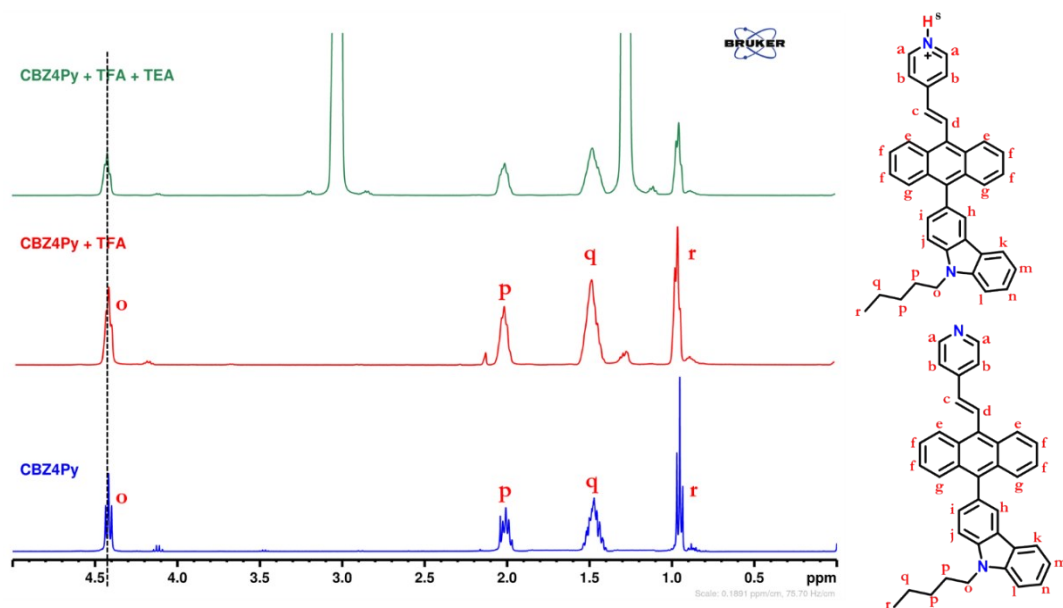

**Fig S22:**  $^1\text{H}$  NMR titration with TFA/TEA for **CBZ4Py** in  $\text{CDCl}_3$  (for aliphatic protons without any shifts)

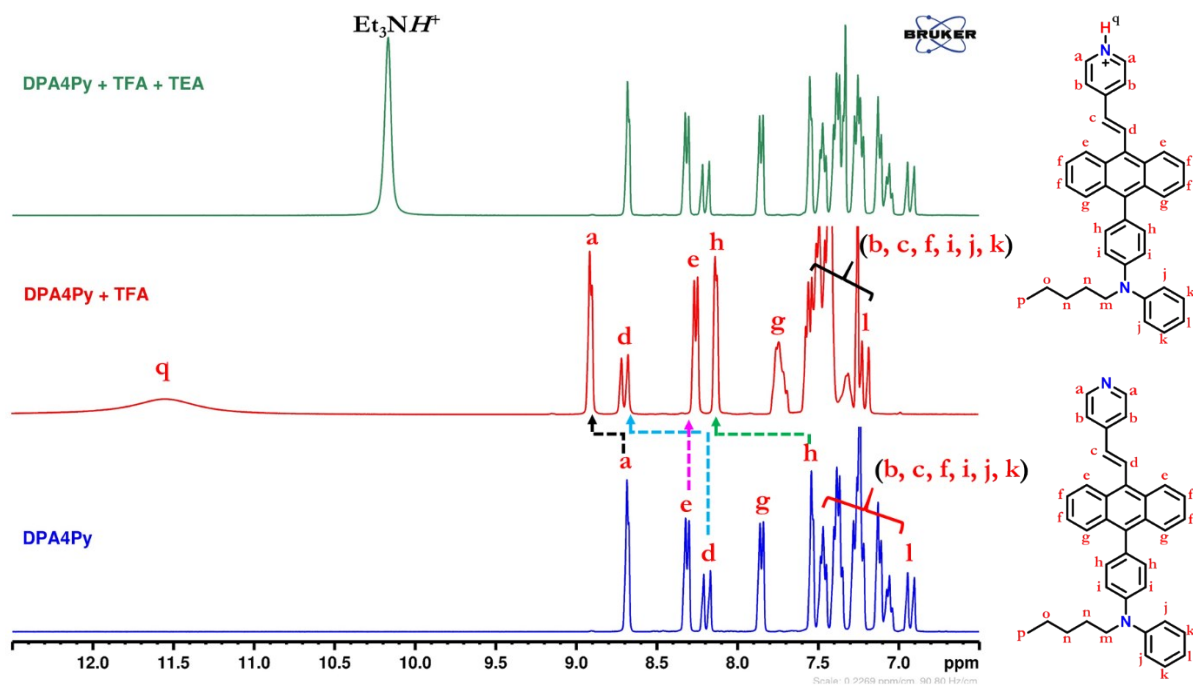

**Fig S23:**  $^1\text{H}$  NMR titration with TFA/TEA for **DPA4Py** in  $\text{CDCl}_3$  (for aromatic protons)



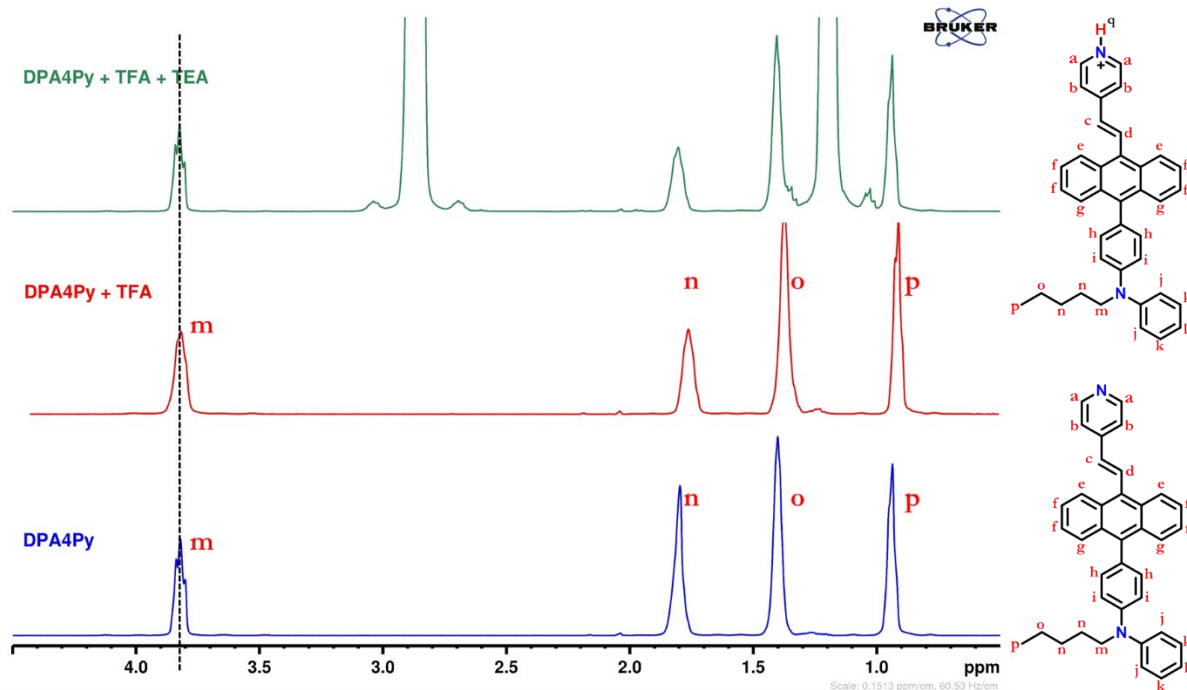

**Fig S24:**  $^1\text{H}$  NMR titration with TFA/TEA for **DPA4Py** in  $\text{CDCl}_3$  (for aliphatic protons)

**Table-S4:** Lifetime parameters for **CBZ4Py**, **DPA4Py-B** and **DPA4Py-G** in their solid-states

| Probes          | States     | $\tau_1$ | $\tau_2$ | $\tau_3$ | $A_1$ | $A_2$ | $A_3$ | Avg.<br>LT( $\tau/\text{ns}$ ) | $\chi^2$ |
|-----------------|------------|----------|----------|----------|-------|-------|-------|--------------------------------|----------|
| <b>CBZ4Py</b>   | Pristine   | 0.36     | 1.56     | 3.51     | 0.11  | 0.70  | 0.19  | <b>1.80</b>                    | 1.1      |
|                 | Ground     | 0.31     | 1.45     | 3.08     | 0.46  | 0.46  | 0.08  | <b>1.06</b>                    | 1.06     |
|                 | Annealed   | 0.71     | 0.15     | 2.15     | 0.47  | 0.36  | 0.07  | <b>0.74</b>                    | 1.1      |
|                 | Protonated | 0.46     | 1.74     | 4.59     | 0.15  | 0.69  | 0.16  | <b>2.01</b>                    | 1.0      |
| <b>DPA4Py-B</b> | Pristine   | 0.41     | 2.43     | 8.99     | 0.47  | 0.50  | 0.03  | <b>1.59</b>                    | 1.12     |
|                 | Ground     | 1.07     | 3.06     | 10.99    | 0.49  | 0.49  | 0.02  | <b>2.24</b>                    | 1.10     |
|                 | Annealed   | 0.44     | 3.06     | 11.42    | 0.37  | 0.60  | 0.03  | <b>2.31</b>                    | 1.20     |

|                 |            |      |      |       |      |      |      |      |      |
|-----------------|------------|------|------|-------|------|------|------|------|------|
|                 | Protonated | 3.50 | 4.19 | 6.37  | 0.46 | 0.46 | 0.08 | 4.05 | 1.11 |
| <b>DPA4Py-G</b> | Pristine   | 0.38 | 2.86 | 9.10  | 0.43 | 0.53 | 0.04 | 2.02 | 1.17 |
|                 | Ground     | 1.04 | 3.01 | 10.46 | 0.47 | 0.51 | 0.02 | 2.23 | 1.11 |
|                 | Annealed   | 0.43 | 3.04 | 11.15 | 0.37 | 0.60 | 0.03 | 2.29 | 1.18 |
|                 | Protonated | 3.35 | 4.28 | 7.28  | 0.48 | 0.45 | 0.07 | 4.04 | 1.25 |

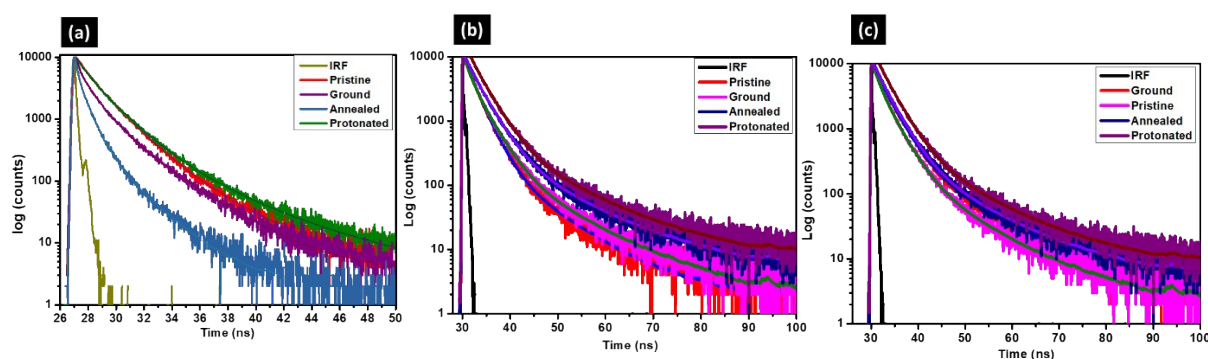

**Fig S25:** Lifetime plot for (a) **CBZ4Py**, (b) **DPA4Py-B** and (c) **DPA4Py-G**

## References:

(1) Gaussian 16, Revision A.03, M. J. Frisch, G. W. Trucks, H. B. Schlegel, G. E. Scuseria; M. A. Robb; J. R. Cheeseman, G. Scalmani, V. Barone, G. A. Petersson, H. Nakatsuji, X. Li, M. Caricato, A. V. Marenich, J. Bloino, B. G. Janesko, R. Gomperts, B. Mennucci, H. P. Hratchian, J. V. Ortiz, A. F. Izmaylov, J. L. Williams; F. Ding; F. Lipparini, F. Egidi, J. Goings, B. Peng, A. Petrone, T. Henderson, D. Ranasinghe, V. G. Zakrzewski, J. Gao, N. Rega, G. Zheng, W. Liang, M. Hada, M. Ehara, K. Toyota, R. Fukuda, J. Hasegawa, M. Ishida, T. Nakajima, Y. Honda, O. Kitao, H. Nakai, T. Vreven, K. Throssell, J. A. Montgomery Jr., J. E. Peralta, F. Ogliaro, M. J. Bearpark, J. J. Heyd, E. N. Brothers, K. N. Kudin, V. N. Staroverov, T. A. Keith, R. Kobayashi, J. Normand, K. Raghavachari, A. P. Rendell, J. C. Burant, S. S. Iyengar, J. Tomasi, M. Cossi, J. M. Millam, M. Klene, C. Adamo, R. Cammi, J. W. Ochterski, R. L. Martin, K. Morokuma, O. Farkas, J. B. Foresman and D. J. Fox, Gaussian, Inc., Wallingford CT, 2016.

(2) C. Lee, W. Yang, R. G. Parr, *Phys. Rev. B*, 1988, **37**, 785–789; (b) B. Miehlich, A. Savin, H. Stoll, H. Preuss, *Chem. Phys. Lett.*, 1989, **157**, 200–206.

(3) (a) S. Grimme, S. Ehrlich, L. Goerigk, *J Comput Chem.* 2011, **32**, 1456–1465; (b) S. Grimme, J. Antony, S. Ehrlich, H. Krieg, *J. Chem. Phys.* 2010, **132**, 154104–154123; (c) S. Grimme, *J. Comput. Chem.*, 2004, **25**, 1463–1476; (d) S. Grimme, *J. Comput. Chem.*, 2006, **27**, 1787–1799.

(4) T. Yanai, D. P. Tew, N. C. Handy, *Chem. Phys. Lett.* 2004, 393, 51–57.

(5) T. Lu, F. Chen, *J. Comput. Chem.* 2012, 33, 580-592.

-----END-----
